# Supplementary material for: In vitro assessment of pacing as therapy for aortic regurgitation
Source: PubMed Central journal article supplement (PMC6546189; doi:10.1136/openhrt-2018-000976), 2019-05-24
Supplement: openhrt-2018-000976supp001.pdf [file openhrt-2018-000976supp001.pdf]

1 **APPENDIX A**

2 The mean diastolic pressure difference measured between the ventricular and aortic chamber ( $\Delta P_D$ ) is large  
 3 enough to consider the length of the orifice insignificant; i.e. the leakage flow only depends on chambers  
 4 pressures and fluid density ( $\rho$ )[22], which is similar for saline solution and blood. In this condition the  
 5 leakage rate can be estimated by the conservation of the fluid energy per unit of volume between the  
 6 aortic root and the left ventricle. With reference to the notation in Fig. 4, the energy balance reads:

$$7 \quad p_{Ao} = p_V + \frac{\rho}{2} U^2; \quad (A1)$$

8 where  $p_{Ao}$  and  $p_V$  are the mean aortic and the mean ventricle pressure, respectively, and  $U$  is the velocity of  
 9 the leaking jet. Being the mean diastolic pressure difference equal to the difference between aortic and  
 10 ventricular pressure ( $\Delta P_D = p_{Ao} - p_V$ ), the velocity  $U_{leak}$  can be expressed as:

$$11 \quad U = \sqrt{2 \cdot \Delta p_D / \rho} \quad (A2)$$

12 Since in the presented in-vitro tests  $\Delta P_D$  is about 100 mmHg, Eq. (A2) gives a value of  $U = 1.6$  m/s.

13 The leakage flow rate ( $Q$ ) is given by the product of the jet velocity and and the area of its cross section,  
 14 i.e.:

$$15 \quad Q = U \cdot A_{jet} = U \cdot A_{orifice} \cdot c_c; \quad (A3)$$

16 where  $c_c$  is the contraction coefficient which accounts for the effective orifice area of the section, and is  
 17 equal to 0.61. The rough estimation of the flow rate given by the Eq. (A3) ( $A_{orifice}$  is assumed to be circular) is  
 18  $Q = 12$  ml/s. This is not far from the 15-20 ml/s measured in the end diastolic period (see Fig. 2), which also  
 19 consider a not negligible fraction due to diffusive paravalvular leakage, distributed along the contact region  
 20 between the frame and the host housing.
